# Supplementary material for: Primary Sulfate Is the Dominant Source of Particulate Sulfate during Winter in Fairbanks, Alaska
Source: PubMed Central journal article supplement — ACS EST Air. 2023 Nov 29;1(3):139–49. doi: 10.1021/acsestair.3c00023 (PMC10928653; doi:10.1021/acsestair.3c00023), 2023-11-29
Supplement: ea3c00023_si_002.pdf [file ea3c00023_si_002.pdf]

```
#####  
Here is the code for the Bayesian isotope mixing model used in this study including source signature  
calculations.
```

```
import arviz as az  
import corner  
import matplotlib as mpl  
import matplotlib.pyplot as plt  
import numpy as np  
import scipy.stats as stats  
import pandas as pd  
import pymc as pm  
import pymc.sampling_jax  
import jaxlib  
  
###read in data here  
obs_rawdata_df = pd.read_excel('###')  
obs_data_df = obs_rawdata_df.set_index('sampleID')  
obs_data_df  
  
#Configurations  
NUM_MCMC_CHAINS = 10  
LENGTH_MCMC_CHAIN = 40000  
BURNIN_LENGTH = int(0.25*LENGTH_MCMC_CHAIN) # discard this number of initial steps while  
calculating the statistics of f  
  
all_factor_marginal_stats_df_arr = []  
modeled_val_df_arr = []  
samples_closest_to_median_in_5D = []  
idata_arr = []  
  
obs_data_for_pymc_df = obs_data_df.iloc[0:10]  
d34S = obs_data_df['d34S']  
d18O = obs_data_df['O18']  
D17O = obs_data_df['O17']  
SOR = obs_data_df['SOR']  
temp = obs_data_df['CTC_temp_3m_C']  
  
### d18O(SO4) source signatures  
# gas-phase chemistry  
d18O_H2O_vapor = (temp*0.403)-25.946  
d18O_OH = (0.71*d18O_H2O_vapor)+16.5  
  
#aqueous-phase chemistry  
d18O_H2O_liquid = (temp*0.4315) - 17.224  
d18O_SIV = (d18O_H2O_liquid*0.9447) + 7.7837  
  
d18O_NO2 = (d18O_SIV*0.75) + (d18O_H2O_liquid*0.25)
```

```
d18O_TMI = (d18O_SIV*0.75) + (23.5*0.25) #d18O(O2) = 23.5
d18O_H2O2 = (d18O_SIV*0.5) + (35*0.5) #d18O(H2O2) = 35
d18O_HOOH = (d18O_SIV*0.5) + (23.5*0.5) #d18O(O2(aq))= 23.5
d18O_O3 = (d18O_SIV*0.75) + (130*0.25) #d18O(O3) = 130
d18O_primary = 23.5
```

```
### D17O(SO4) source signatures
```

```
D17O_primary = -0.34 #Unit: per mille
```

```
D17O_O3 = 9.8 #Unit: per mille
```

```
D17O_H2O2 = 0.81
```

```
D17O_HOOH = -0.17
```

```
D17O_OH = 0
```

```
D17O_TMI = -0.085
```

```
D17O_NO2 = 0
```

```
### d34S(SO4) source signatures
```

```
#reference Harris et al. 2012 and 2013
```

```
# e = epsilon values
```

```
e_OH = (-0.004*temp) + 10.6 + 1
```

```
e_H2O2 = (-0.085*temp) + 16.51 + 1
```

```
e_O3 = (-0.085*temp) + 16.51 + 1
```

```
e_TMI = (-0.237*temp) + -5.039 + 1
```

```
e_NO2 = 1
```

```
d34S_SO4_primary = 4.7
```

```
d34S_emission = 4.7
```

```
obs_data_for_pymc_df = obs_data_df.iloc[0:63]
```

```
for i_sample_id in obs_data_for_pymc_df.index:
```

```
    i_d18O = obs_data_df.loc[i_sample_id, 'O18']
```

```
    i_D17O = obs_data_df.loc[i_sample_id, 'O17']
```

```
    i_d34S = obs_data_df.loc[i_sample_id, 'd34S']
```

```
    i_SO4_obs = obs_data_df.loc[i_sample_id, 'SO4_umol']
```

```
    i_SO2_obs = obs_data_df.loc[i_sample_id, 'SO2_umol']
```

```
    i_e_TMI = obs_data_df.loc[i_sample_id, 'e_TMI']
```

```
    i_e_O3 = obs_data_df.loc[i_sample_id, 'e_O3']
```

```
    i_e_H2O2 = obs_data_df.loc[i_sample_id, 'e_H2O2']
```

```
    i_e_OH = obs_data_df.loc[i_sample_id, 'e_OH']
```

```
    i_d18O_TMI = obs_data_df.loc[i_sample_id, 'd18O_TMI']
```

```
    i_d18O_O3 = obs_data_df.loc[i_sample_id, 'd18O_O3']
```

```
    i_d18O_H2O2 = obs_data_df.loc[i_sample_id, 'd18O_H2O2']
```

```
    i_d18O_OH = obs_data_df.loc[i_sample_id, 'd18O_OH']
```

```
    i_d18O_NO2 = obs_data_df.loc[i_sample_id, 'd18O_NO2']
```

```
    i_obs = np.array([i_D17O, i_d18O, i_d34S]) # order: D17O, d18O
```

```
with pm.Model() as model:
```

```
    # this is where you weigh the importance of different pathways.
```

```
    #Its useful when two signatures are very similar
```

```
    #but you have good reason to believe one is more dominant than another
```

```

#(pH, photolysis rates, O3 obs, HYSPLIT, etc)
f = pm.Dirichlet('f', a=[1,1,1,1,1,1]) # Using equal weight prior

f_primary = pm.Deterministic("f_primary", f[0])
f_OH = pm.Deterministic("f_OH", f[1])
#f_HOOH_pm = pm.Deterministic("f_HOOH_pm", f[2])
f_H2O2 = pm.Deterministic("f_H2O2", f[2])
f_TMI = pm.Deterministic("f_TMI", f[3])
f_O3 = pm.Deterministic("f_O3", f[4])
f_NO2 = pm.Deterministic("f_NO2", f[5])

# Statistics of the observations
###these are the analytical errors // can also expand to get a larger range of uncertainty
obs_D17O_std = 0.16 #Unit: per mille
obs_d18O_std = 0.8 #Unit: per mille
obs_d34S_std = 1.0
obs_D17O_var = obs_D17O_std**2
obs_d18O_var = obs_d18O_std**2
obs_d34S_var = obs_d34S_std**2
obs_D17O_d18O_correlation = 0.0
obs_D17O_d34S_correlation = 0.0
obs_d18O_d34S_correlation = 0.0

obs_D17O_d18O_cov = obs_D17O_std*obs_d18O_std*obs_D17O_d18O_correlation
obs_D17O_d34S_cov = obs_D17O_std*obs_d34S_std*obs_D17O_d34S_correlation
obs_d18O_d34S_cov = obs_d18O_std*obs_d34S_std*obs_d18O_d34S_correlation

# Main dish :-
model_D17O = pm.Deterministic("model_D17O", f_primary*D17O_primary + f_O3*D17O_O3 +
f_H2O2*D17O_H2O2 + f_OH*D17O_OH + f_NO2*D17O_NO2 + f_TMI*D17O_TMI )
model_d18O = pm.Deterministic("model_d18O", f_primary*d18O_primary + f_O3*i_d18O_O3 +
f_H2O2*i_d18O_H2O2 + f_OH*i_d18O_OH + f_NO2*i_d18O_NO2 + f_TMI*i_d18O_TMI)
###we calculate SOR_2nd since the fraction of primary sulfate is large and independent of chemical
fractionation
###this is not necessary in secondary sulfate-dominated regimes
SO4_secondary_umol = i_SO4_obs*(1-f_primary)
SOR_2nd = SO4_secondary_umol / (SO4_secondary_umol + i_SO2_obs)
model_d34S_epsilon = pm.Deterministic("model_d34S_epsilon", f_primary*4.7 + (1-f_primary)*(-
1*((d34S_emission- (i_e_O3*f_O3/(1-f_primary))+ (i_e_H2O2*f_H2O2/(1-f_primary))+
(i_e_OH*f_OH/(1-f_primary)) + (e_NO2*f_NO2/(1-f_primary))+ (i_e_TMI*f_TMI/(1-
f_primary)))*(np.log(SOR_2nd)*((1-SOR_2nd)/SOR_2nd))))))

# Likelihood function
obs = pm.MvNormal("obs", observed = i_obs,
mu=[model_D17O, model_d18O,model_d34S_epsilon],
cov=np.array([[obs_D17O_var,obs_D17O_d18O_cov,obs_D17O_d34S_cov],
[obs_D17O_d18O_cov,obs_d18O_var,obs_d18O_d34S_cov],
[obs_D17O_d34S_cov,obs_d18O_d34S_cov,obs_d34S_var]]))

```

```

idata_Dirichlet = pm.sampling_jax.sample_numpyro_nuts(draws=LENGTH_MCMC_CHAIN,
                                                    chains=NUM_MCMC_CHAINS,
                                                    tune=4000)

# Create the corner plot
corner.corner(idata_Dirichlet, var_names=['f_primary', 'f_OH', 'f_H2O2', 'f_TMI', 'f_O3', 'f_NO2'])
plt.suptitle("{}'s corner plot".format(i_sample_id), fontsize=30)
plt.show()

# Save the statistics for each sample for later

i_all_factor_df = idata_Dirichlet['posterior']['f'].isel(draw=slice(BURNIN_LENGTH,
None)).stack({'sample':['chain','draw']}).to_dataframe()['f'].unstack('f_dim_0')
i_all_factor_df.rows = ['f_primary', 'f_OH', 'f_H2O2', 'f_TMI', 'f_O3', 'f_NO2']
i_all_factor_marginal_stats_df = pd.DataFrame()

for i_factor in i_all_factor_df.columns:

    i_all_factor_marginal_stats_df.loc['2.5th percentile',i_factor] =
i_all_factor_df[i_factor].quantile(0.025)
    i_all_factor_marginal_stats_df.loc['25th percentile',i_factor] = i_all_factor_df[i_factor].quantile(0.25)
    i_all_factor_marginal_stats_df.loc['Median',i_factor] = i_all_factor_df[i_factor].quantile(0.5)
    i_all_factor_marginal_stats_df.loc['75th percentile',i_factor] = i_all_factor_df[i_factor].quantile(0.75)
    i_all_factor_marginal_stats_df.loc['97.5th percentile',i_factor] =
i_all_factor_df[i_factor].quantile(0.975)

all_factor_marginal_stats_df_arr += [i_all_factor_marginal_stats_df]

i_model_vals_df = idata_Dirichlet.posterior[['model_D170', 'model_d180',
'model_d34S_epsilon']].isel(draw=slice(BURNIN_LENGTH,
None)).stack({'sample':['chain','draw']}).to_dataframe()
i_modeled_val_stats_df = pd.DataFrame()

for i_model_val_type in ['model_D170', 'model_d180', 'model_d34S_epsilon']:

    i_modeled_val_stats_df.loc['2.5th percentile',i_model_val_type] =
i_model_vals_df[i_model_val_type].quantile(0.025)
    i_modeled_val_stats_df.loc['25th percentile',i_model_val_type] =
i_model_vals_df[i_model_val_type].quantile(0.25)
    i_modeled_val_stats_df.loc['Median',i_model_val_type] =
i_model_vals_df[i_model_val_type].quantile(0.5)
    i_modeled_val_stats_df.loc['75th percentile',i_model_val_type] =
i_model_vals_df[i_model_val_type].quantile(0.75)
    i_modeled_val_stats_df.loc['97.5th percentile',i_model_val_type] =
i_model_vals_df[i_model_val_type].quantile(0.975)

modeled_val_df_arr += [i_modeled_val_stats_df]

```

```
idata_arr += [idata_Dirichlet]
```

```
#####
```

```
#### Output statistics
```

```
all_factor_marginal_stats_df = pd.concat(all_factor_marginal_stats_df_arr, axis=0,
keys=obs_data_for_pymc_df.index)
modeled_vals_df = pd.concat(modeled_val_df_arr, axis=0, keys=obs_data_for_pymc_df.index)
modeled_D17O_stats_df = modeled_vals_df.loc[:, 'model_D17O'].unstack()
modeled_d18O_stats_df = modeled_vals_df.loc[:, 'model_d18O'].unstack()
modeled_d34S_stats_df = modeled_vals_df.loc[:, 'model_d34S_epsilon'].unstack()
```

```
all_factor_marginal_stats_df = pd.concat(all_factor_marginal_stats_df_arr, axis=0,
keys=obs_data_for_pymc_df.index)
modeled_vals_df = pd.concat(modeled_val_df_arr, axis=0, keys=obs_data_for_pymc_df.index)
modeled_D17O_stats_df = modeled_vals_df.loc[:, 'model_D17O'].unstack()
modeled_d18O_stats_df = modeled_vals_df.loc[:, 'model_d18O'].unstack()
modeled_d34S_stats_df = modeled_vals_df.loc[:, 'model_d34S_epsilon'].unstack()
```

```
f_primary_marginal_stats_df = all_factor_marginal_stats_df.loc[:,0].unstack()
f_OH_marginal_stats_df = all_factor_marginal_stats_df.loc[:,1].unstack()
f_HOOH_marginal_stats_df = all_factor_marginal_stats_df.loc[:,2].unstack()
f_TMI_marginal_stats_df = all_factor_marginal_stats_df.loc[:,3].unstack()
f_O3_marginal_stats_df = all_factor_marginal_stats_df.loc[:,4].unstack()
f_NO2_marginal_stats_df = all_factor_marginal_stats_df.loc[:,5].unstack()
```

```
f_primary_marginal_stats_df = all_factor_marginal_stats_df.loc[:,0].unstack()
Primary = f_primary_marginal_stats_df['97.5th percentile']
print(*Primary)
```

```
f_OH_marginal_stats_df = all_factor_marginal_stats_df.loc[:,1].unstack()
OH = f_OH_marginal_stats_df['97.5th percentile']
print(*OH)
```

```
f_H2O2_marginal_stats_df = all_factor_marginal_stats_df.loc[:,2].unstack()
H2O2 = f_H2O2_marginal_stats_df['97.5th percentile']
print(*H2O2)
```

```
f_TMI_marginal_stats_df = all_factor_marginal_stats_df.loc[:,3].unstack()
TMI = f_TMI_marginal_stats_df['97.5th percentile']
print(*TMI)
```

```
f_O3_marginal_stats_df = all_factor_marginal_stats_df.loc[:,4].unstack()
O3 = f_O3_marginal_stats_df['97.5th percentile']
print(*O3)
```

```
f_NO2_marginal_stats_df = all_factor_marginal_stats_df.loc[:,5].unstack()
NO2 = f_NO2_marginal_stats_df['97.5th percentile']
```

```
print(*NO2)
```

```
f_primary_marginal_stats_df = all_factor_marginal_stats_df.loc[:,0].unstack()  
Primary = f_primary_marginal_stats_df['2.5th percentile']  
print(*Primary)
```

```
f_OH_marginal_stats_df = all_factor_marginal_stats_df.loc[:,1].unstack()  
OH = f_OH_marginal_stats_df['2.5th percentile']  
print(*OH)
```

```
f_H2O2_marginal_stats_df = all_factor_marginal_stats_df.loc[:,2].unstack()  
H2O2 = f_H2O2_marginal_stats_df['2.5th percentile']  
print(*H2O2)
```

```
f_TMI_marginal_stats_df = all_factor_marginal_stats_df.loc[:,3].unstack()  
TMI = f_TMI_marginal_stats_df['2.5th percentile']  
print(*TMI)
```

```
f_O3_marginal_stats_df = all_factor_marginal_stats_df.loc[:,4].unstack()  
O3 = f_O3_marginal_stats_df['2.5th percentile']  
print(*O3)
```

```
f_NO2_marginal_stats_df = all_factor_marginal_stats_df.loc[:,5].unstack()  
NO2 = f_NO2_marginal_stats_df['2.5th percentile']  
print(*NO2)
```

```
##### compare model output with observations
```

```
all_factor_marginal_stats_df = pd.concat(all_factor_marginal_stats_df_arr, axis=0,  
keys=obs_data_for_pymc_df.index)  
modeled_vals_df = pd.concat(modeled_val_df_arr, axis=0, keys=obs_data_for_pymc_df.index)  
modeled_D17O_stats_df = modeled_vals_df.loc[:, 'model_D17O'].unstack()  
modeled_d18O_stats_df = modeled_vals_df.loc[:, 'model_d18O'].unstack()  
#modeled_d34S_stats_df = modeled_vals_df.loc[:, 'model_d34S'].unstack()  
modeled_d34S_stats_df = modeled_vals_df.loc[:, 'model_d34S_epsilon'].unstack()
```

```
all_factor_marginal_stats_df = pd.concat(all_factor_marginal_stats_df_arr, axis=0,  
keys=obs_data_for_pymc_df.index)  
modeled_vals_df = pd.concat(modeled_val_df_arr, axis=0, keys=obs_data_for_pymc_df.index)  
modeled_D17O_stats_df = modeled_vals_df.loc[:, 'model_D17O'].unstack()  
modeled_d18O_stats_df = modeled_vals_df.loc[:, 'model_d18O'].unstack()  
#modeled_d34S_stats_df = modeled_vals_df.loc[:, 'model_d34S'].unstack()  
modeled_d34S_stats_df = modeled_vals_df.loc[:, 'model_d34S_epsilon'].unstack()
```

```
f_primary_marginal_stats_df = all_factor_marginal_stats_df.loc[:,0].unstack()  
f_O3_marginal_stats_df = all_factor_marginal_stats_df.loc[:,4].unstack()  
#f_H2O2_marginal_stats_df = all_factor_marginal_stats_df.loc[:,2].unstack()  
f_OH_marginal_stats_df = all_factor_marginal_stats_df.loc[:,1].unstack()
```

```

f_TMI_marginal_stats_df = all_factor_marginal_stats_df.loc[:,3].unstack()
f_NO2_marginal_stats_df = all_factor_marginal_stats_df.loc[:,5].unstack()
f_HOOH_marginal_stats_df = all_factor_marginal_stats_df.loc[:,2].unstack()
i_SO4_obs = obs_data_df.loc[i_sample_id, 'SO4_umol']
i_SO2_obs = obs_data_df.loc[i_sample_id, 'SO2_umol']
i_d34S = obs_data_df.loc[i_sample_id, 'd34S']

```

```

plt.figure(figsize=(5,5), dpi=300)
plt.scatter(y=modeled_D17O_stats_df['Median'],
           x=obs_data_df.loc[obs_data_for_pymc_df.index,'O17'],
           marker='x', color='k')

```

```

plt.plot(np.arange(-100,100),
         np.arange(-100,100),
         linestyle='--', alpha=0.5, color='k')
plt.gca().set_aspect('equal')

```

```

plt.xlim(-0.3,3)
plt.xlabel('$\Delta^{17}$O Observations(‰)')

```

```

plt.ylim(-0.3,3)
plt.ylabel('MCMC Median $\Delta^{17}$O (‰)')
plt.title('$\Delta^{17}$O')
plt.show()

```

```

plt.figure(figsize=(5,5), dpi=300)
plt.scatter(y=modeled_d18O_stats_df['Median'],
           x=obs_data_df.loc[obs_data_for_pymc_df.index,'O18'],
           marker='x', color='k')

```

```

plt.plot(np.arange(-100,100),
         np.arange(-100,100),
         linestyle='--', alpha=0.5, color='k')
plt.gca().set_aspect('equal')

```

```

plt.xlim(0,25)
plt.ylim(0,25)
plt.xlabel('$\delta^{18}$O Observations (‰)')
plt.ylabel('MCMC Median $\delta^{18}$O (‰)')
plt.title('$\delta^{18}$O')

```

```

plt.show()

```

```

plt.figure(figsize=(5,5), dpi=300)
plt.scatter(y=modeled_d34S_stats_df['Median'],
           x=obs_data_df.loc[obs_data_for_pymc_df.index,'d34S'],
           marker='x', color='k')

```

```

plt.plot(np.arange(-100,100),
         np.arange(-100,100),
         linestyle='--', alpha=0.5, color='k')
plt.gca().set_aspect('equal')

plt.xlim(3.3,10)
plt.ylim(3,10)
#ax.text(4, 9, 'R $\Delta^3$  = 0.68', color = 'k', fontsize = 22)

plt.xlabel('$\Delta^{34}$S Observations (‰)')
plt.ylabel('MCMC Median $\Delta^{34}$S (‰)')
plt.title('$\Delta^{34}$S')

plt.show()

plt.figure(figsize=(10,5), dpi=300)

plt.plot(modeled_D17O_stats_df.index,
         modeled_D17O_stats_df['Median'],
         label="MCMC samples' median",
         linewidth=3, alpha=.7, color='darkgoldenrod')
plt.fill_between(x=modeled_D17O_stats_df.index,
                 y1=modeled_D17O_stats_df['2.5th percentile'],
                 y2=modeled_D17O_stats_df['97.5th percentile'],
                 label="MCMC samples' 2.5 to 97.5th percentiles",
                 linewidth=2, alpha=.25, color='goldenrod')

plt.plot(obs_data_for_pymc_df.index,
         obs_data_df.loc[obs_data_for_pymc_df.index,'O17'],
         label="Observations",
         color='k', linewidth=2, alpha=.7)

plt.tick_params(rotation=90, axis='x')
plt.ylabel('$\Delta^{17}$O ‰')

plt.legend()
plt.title('$\Delta^{17}$O', fontsize=18)
plt.show()

# Plot d18O

plt.figure(figsize=(10,5), dpi=300)

plt.plot(modeled_d18O_stats_df.index,
         modeled_d18O_stats_df['Median'],
         label="MCMC samples' median",

```



```

        linewidth=3, alpha=.75, color='purple')
plt.fill_between(x=modelled_d18O_stats_df.index,
                y1=modelled_d18O_stats_df['2.5th percentile'],
                y2=modelled_d18O_stats_df['97.5th percentile'],
                label="MCMC samples' 2.5 to 97.5th percentiles",
                linewidth=2, alpha=.1, color='indigo')

plt.plot(obs_data_for_pymc_df.index,
         obs_data_df.loc[obs_data_for_pymc_df.index,'O18'],
         label="Observations",
         color='k', linewidth=2, alpha=.6)

plt.tick_params(rotation=90, axis='x')
plt.ylabel((' $\delta^{18}O$ ‰'))

plt.legend()
plt.title(' $\delta^{18}O$', fontsize=18)
plt.show()

```

```

# Plot d34S_2nd
plt.figure(figsize=(10,5), dpi=300)

plt.plot(modelled_d34S_stats_df.index,
         modelled_d34S_stats_df['Median'],
         label="MCMC samples' median",
         linewidth=3, alpha=.75, color='b')
plt.fill_between(x=modelled_d34S_stats_df.index,
                y1=modelled_d34S_stats_df['2.5th percentile'],
                y2=modelled_d34S_stats_df['97.5th percentile'],
                label="MCMC samples' 2.5 to 97.5th percentiles",
                linewidth=2, alpha=.1, color='b')

plt.plot(obs_data_for_pymc_df.index,
         obs_data_df.loc[obs_data_for_pymc_df.index,'d34S'],
         label="Observations",
         color='k', linewidth=2, alpha=.6)

plt.tick_params(rotation=90, axis='x')
plt.ylabel((' $\delta^{34}S$ ‰'))

plt.legend()
plt.title(' $\delta^{34}S$', fontsize=18)
plt.show()

d34S_2nd = modelled_d34S_stats_df['Median']
d34S_lower = modelled_d34S_stats_df['2.5th percentile']
d34S_upper = modelled_d34S_stats_df['97.5th percentile']

```

```

f_primary = f_primary_marginal_stats_df['Median']

d34S_MCMC = (f_primary*4.5) + (d34S_2nd*(1-f_primary))
d34S_MCMC_lower = (f_primary*4.5) + (d34S_lower *(1-f_primary))
d34S_MCMC_upper = (f_primary*4.5) + (d34S_upper *(1-f_primary))

plt.figure(figsize=(10,5), dpi=300)

plt.plot(modeled_d34S_stats_df.index,
         d34S_MCMC,
         label="MCMC samples' median",
         linewidth=3, alpha=.75, color='b')
plt.fill_between(x=modeled_d34S_stats_df.index,
                y1=d34S_MCMC_lower ,
                y2=d34S_MCMC_upper,
                label="MCMC samples' 2.5 to 97.5th percentiles",
                linewidth=2, alpha=.1, color='b')

plt.plot(obs_data_for_pymc_df.index,
         obs_data_df.loc[obs_data_for_pymc_df.index,'d34S'],
         label="Observations",
         color='k', linewidth=2, alpha=.6)

plt.tick_params(rotation=90, axis='x')
plt.ylabel(('$\delta^{34}$S ‰'))

plt.legend()
plt.title('$\delta^{34}$S',fontsize=18)
plt.show()

###bar chart

import seaborn as sns
from sklearn import preprocessing
import numpy as np

all_factor_marginal_stats_df = pd.concat(all_factor_marginal_stats_df_arr, axis=0,
keys=obs_data_for_pymc_df.index)

modeled_vals_df = pd.concat(modeled_val_df_arr, axis=0, keys=obs_data_for_pymc_df.index)

f_primary_marginal_stats_df = all_factor_marginal_stats_df.loc[:,0].unstack()
f_O3_marginal_stats_df = all_factor_marginal_stats_df.loc[:,4].unstack()
f_H2O2_marginal_stats_df = all_factor_marginal_stats_df.loc[:,2].unstack()
f_OH_marginal_stats_df = all_factor_marginal_stats_df.loc[:,1].unstack()
f_TMI_marginal_stats_df = all_factor_marginal_stats_df.loc[:,3].unstack()
f_NO2_marginal_stats_df = all_factor_marginal_stats_df.loc[:,5].unstack()

```

```
all_factor_marginal_stats_df = pd.concat(all_factor_marginal_stats_df_arr, axis=0,
keys=obs_data_for_pymc_df.index)
```

```
labels = f_primary_marginal_stats_df.index
labels = f_primary_marginal_stats_df.index
```

```
j=20
f_primary_marginal_stats_df = all_factor_marginal_stats_df.loc[:,0].unstack()
Primary = f_primary_marginal_stats_df['Median']
```

```
f_OH_marginal_stats_df = all_factor_marginal_stats_df.loc[:,1].unstack()
OH = f_OH_marginal_stats_df['Median']
```

```
f_H2O2_marginal_stats_df = all_factor_marginal_stats_df.loc[:,2].unstack()
H2O2 = f_H2O2_marginal_stats_df['Median']
```

```
f_TMI_marginal_stats_df = all_factor_marginal_stats_df.loc[:,3].unstack()
TMI = f_TMI_marginal_stats_df['Median']
```

```
f_O3_marginal_stats_df = all_factor_marginal_stats_df.loc[:,4].unstack()
O3 = f_O3_marginal_stats_df['Median']
```

```
f_NO2_marginal_stats_df = all_factor_marginal_stats_df.loc[:,5].unstack()
NO2 = f_NO2_marginal_stats_df['Median']
```

```
fig, ax = plt.subplots(figsize=(20,8), dpi=500)
width = 0.88
```

```
#pal = sns.color_palette("Set1")
#rescale = lambda y: (y - np.min(y)) / (np.max(y) - np.min(y))
Norm = 1/(Primary+OH+O3+TMI+H2O2+NO2)
O3 = Norm*O3
OH=Norm*OH
TMI=Norm*TMI
H2O2=Norm*H2O2
Primary =Norm*Primary
NO2 = Norm*NO2
#triplet = Norm*triplet
```

```
NO2_plt = ax.bar(labels[0:43], NO2[0:43], width, color='teal',alpha=0.6,label='NO2$2$')
O3_plt =ax.bar(labels[0:43], O3[0:43], width, bottom = NO2[0:43], color='gold', alpha=
0.8,label='O3$3$')
OH_plt=ax.bar(labels[0:43], OH[0:43], width, bottom=O3[0:43]+NO2[0:43],
color='darkorange',alpha=0.8, label='OH')
TMI_plt=ax.bar(labels[0:43], TMI[0:43], width, bottom=O3[0:43]+OH[0:43]+NO2[0:43], color=
'mediumvioletred',alpha=0.8,label='TMI')
```

```

H2O2_plt = ax.bar(labels[0:43], H2O2[0:43], width,
bottom=O3[0:43]+TMI[0:43]+OH[0:43]+NO2[0:43],color='mediumblue', alpha=0.5, label='H$ _2$O$ _2$')
primary_plt = ax.bar(labels[0:43], Primary[0:43], width,
bottom=OH[0:43]+TMI[0:43]+H2O2[0:43]+O3[0:43]+NO2[0:43],color='midnightblue',alpha=0.8,label='Pr
imary')
#NO2_plt = ax.bar(labels, NO2, width,
bottom=OH+TMI+H2O2+O3+Primary+NO2,color='teal',alpha=0.6,label='NO2')
#triplet_plt = ax.bar(labels, triplet, width,
bottom=OH+TMI+H2O2+O3+Primary+NO2,color='mediumblue',alpha=0.15,label='triplet')

```

```

ax.set_xticks(f_primary_marginal_stats_df.index[0:43])
ax.set_xlabel('Sample ID',fontsize=16)

```

```

ax.tick_params(axis = 'y', labelsz=16, rotation=0)
plt.tick_params(rotation=90, axis='x',labelz=16)

```

```

ax.set_ylabel('Fraction of PM0.7 Sulfate',fontz=20)
ax.set_title('Sources and Formation of Fairbanks Sulfate',fontz=24)
ax.legend(prop={'size': 16},loc='upper center', bbox_to_anchor=(0.5, -0.3),
fancybox=True, shadow=True, ncol=5)

```

```

for r1, r2, r3, r4, r5,r6 in zip(NO2_plt,O3_plt, OH_plt, TMI_plt, H2O2_plt,primary_plt):

```

```

    h1 = r1.get_height()
    h2 = r2.get_height()
    h3 = r3.get_height()
    h4 =r4.get_height()
    h5 = r5.get_height()
    h6 = r6.get_height()
    plt.text(r1.get_x() + r1.get_width() / 2., h1 / 2., "{}".format(np.round(h1, decimals=2)), ha="center",
va="center", color="white", fontz=8, fontweight="bold")
    plt.text(r2.get_x() + r2.get_width() / 2., (h1 + h2/2), "{}".format(np.round(h2, decimals=2)),
ha="center", va="center", color="midnightblue", fontz=8, fontweight="bold")
    plt.text(r3.get_x() + r3.get_width() / 2., (h1 + h2+h3/2), "{}".format(np.round(h3, decimals=2)),
ha="center", va="center", color="white", fontz=8, fontweight="bold")
    plt.text(r4.get_x() + r4.get_width() / 2., (h1 + h2+h3+h4/2), "{}".format(np.round(h4, decimals=2)),
ha="center", va="center", color="white", fontz=8, fontweight="bold")
    plt.text(r5.get_x() + r5.get_width() / 2., (h1 + h2+h3+h4+h5/2), "{}".format(np.round(h5, decimals=2)),
ha="center", va="center", color="white", fontz=8, fontweight="bold")
    plt.text(r6.get_x() + r6.get_width() / 2., (h1 + h2+h3+h4+h5+h6/2), "{}".format(np.round(h6,
decimals=2)), ha="center", va="center", color="white", fontz=8, fontweight="bold")

```

```

plt.show()

```

```

###time series with 95% confidence interval

```

```

import matplotlib.dates as mdates
all_factor_marginal_stats_df = pd.concat(all_factor_marginal_stats_df_arr, axis=0,
keys=obs_data_for_pymc_df.index)

```

```

all_factor_marginal_stats_df = pd.concat(all_factor_marginal_stats_df_arr, axis=0,
keys=obs_data_for_pymc_df.index)
modeled_vals_df = pd.concat(modeled_val_df_arr, axis=0, keys=obs_data_for_pymc_df.index[0:43])
modeled_D17O_stats_df = modeled_vals_df.loc[:, 'model_D17O'].unstack()
modeled_d18O_stats_df = modeled_vals_df.loc[:, 'model_d18O'].unstack()
modeled_d34S_stats_df = modeled_vals_df.loc[:, 'model_d34S_epsilon'].unstack()

f_primary_marginal_stats_df = all_factor_marginal_stats_df.loc[:,0].unstack()
f_O3_marginal_stats_df = all_factor_marginal_stats_df.loc[:,4].unstack()
f_H2O2_marginal_stats_df = all_factor_marginal_stats_df.loc[:,2].unstack()
f_OH_marginal_stats_df = all_factor_marginal_stats_df.loc[:,1].unstack()
f_TMI_marginal_stats_df = all_factor_marginal_stats_df.loc[:,3].unstack()
f_NO2_marginal_stats_df = all_factor_marginal_stats_df.loc[:,5].unstack()

modeled_vals_df = pd.concat(modeled_val_df_arr, axis=0, keys=obs_data_for_pymc_df.index)
modeled_D17O_stats_df = modeled_vals_df.loc[:, 'model_D17O'].unstack()
modeled_d18O_stats_df = modeled_vals_df.loc[:, 'model_d18O'].unstack()

fig, ax = plt.subplots(figsize=(15,5), dpi=300)

plt.plot(f_primary_marginal_stats_df.index[0:43],
         f_primary_marginal_stats_df['Median'][0:43],
         label="Primary median",
         linewidth=4, alpha=.9, color='midnightblue')
plt.fill_between(f_primary_marginal_stats_df.index[0:43],
                 y1=f_primary_marginal_stats_df['2.5th percentile'][0:43],
                 y2=f_primary_marginal_stats_df['97.5th percentile'][0:43],
                 #label="Primary 25 to 75th percentiles",
                 linewidth=2, alpha=.05, color='midnightblue')

plt.fill_between(f_primary_marginal_stats_df.index[0:43],
                 y1=f_O3_marginal_stats_df['2.5th percentile'][0:43],
                 y2=f_O3_marginal_stats_df['97.5th percentile'][0:43],
                 #label="O3 25 to 75th percentiles",
                 linewidth=2, alpha=.2, color='gold')
plt.plot(f_primary_marginal_stats_df.index[0:43],
         f_O3_marginal_stats_df['Median'][0:43],
         label="O3 Median",
         linewidth=4, alpha=0.9, color='gold')

plt.plot(f_primary_marginal_stats_df.index[0:43],
         f_OH_marginal_stats_df['Median'][0:43],
         label="OH Median",
         linewidth=4, alpha=0.9, color='darkorange')

plt.plot(f_primary_marginal_stats_df.index[0:43],
         f_H2O2_marginal_stats_df['Median'][0:43],
         label="H2O2 median",

```

```

linewidth=4, alpha=0.9, color='mediumblue')
plt.fill_between(f_primary_marginal_stats_df.index[0:43],
                y1=f_H2O2_marginal_stats_df['2.5th percentile'][0:43],
                y2=f_H2O2_marginal_stats_df['97.5th percentile'][0:43],
                #label="H2O2 25 to 75th percentiles",
                linewidth=2, alpha=.05, color='mediumblue')

plt.plot(f_primary_marginal_stats_df.index[0:43],
         f_TMI_marginal_stats_df['Median'][0:43],
         label="TMI-O3 median",
         linewidth=4, alpha=0.9, color='mediumvioletred')
plt.fill_between(f_primary_marginal_stats_df.index[0:43],
                y1=f_TMI_marginal_stats_df['2.5th percentile'][0:43],
                y2=f_TMI_marginal_stats_df['97.5th percentile'][0:43],
                #label="TMI-O3 25 to 75th percentiles",
                linewidth=2, alpha=.1, color='mediumvioletred')

plt.plot(f_primary_marginal_stats_df.index[0:43],
         f_NO2_marginal_stats_df['Median'][0:43],
         label="NO2 median",
         linewidth=4, alpha=0.9, color='gray')
plt.fill_between(f_primary_marginal_stats_df.index[0:43],
                y1=f_NO2_marginal_stats_df['2.5th percentile'][0:43],
                y2=f_NO2_marginal_stats_df['97.5th percentile'][0:43],
                #label="TMI-O3 25 to 75th percentiles",
                linewidth=2, alpha=.15, color='gray')

ax.set_xticks(f_primary_marginal_stats_df.index[0:43])
plt.ylim(0,1)
#ax.xaxis.grid()
#ax.set_xlabel('Sample ID',fontsize=20)
ax.set_ylabel('Fraction of PM0.7 Sulfate',fontsize=24)
ax.set_title('Sources and Formation of Fairbanks Sulfate',fontsize=24)

ax.legend(prop={'size': 14},loc='upper center', bbox_to_anchor=(0.5, -0.3),
          fancybox=True, shadow=True, ncol=5)
ax.tick_params(axis = 'y', labels=20, rotation=0)
plt.tick_params(rotation=90, axis='x',labels=10)
plt.show()

```
